# Supplementary material for: Targeted Modification and Structure-Activity Study of GL-29, an Analogue of the Antimicrobial Peptide Palustrin-2ISb
Source: MDPI journal article supplement (doi:10.3390/antibiotics11081048), 2022-08-03
Supplement: s1 [file s1]

# Targeted modification and structure-activity study of GL-29, an analogue of the antimicrobial peptide palustrin-2ISb

Siyan Liu, Yaxian Lin, Jiachen Liu, Xiaoling Chen, Chengbang Ma, Xinping Xi, Mei Zhou, Tianbao Chen<sup>1</sup>, James F Burrows and Lei Wang

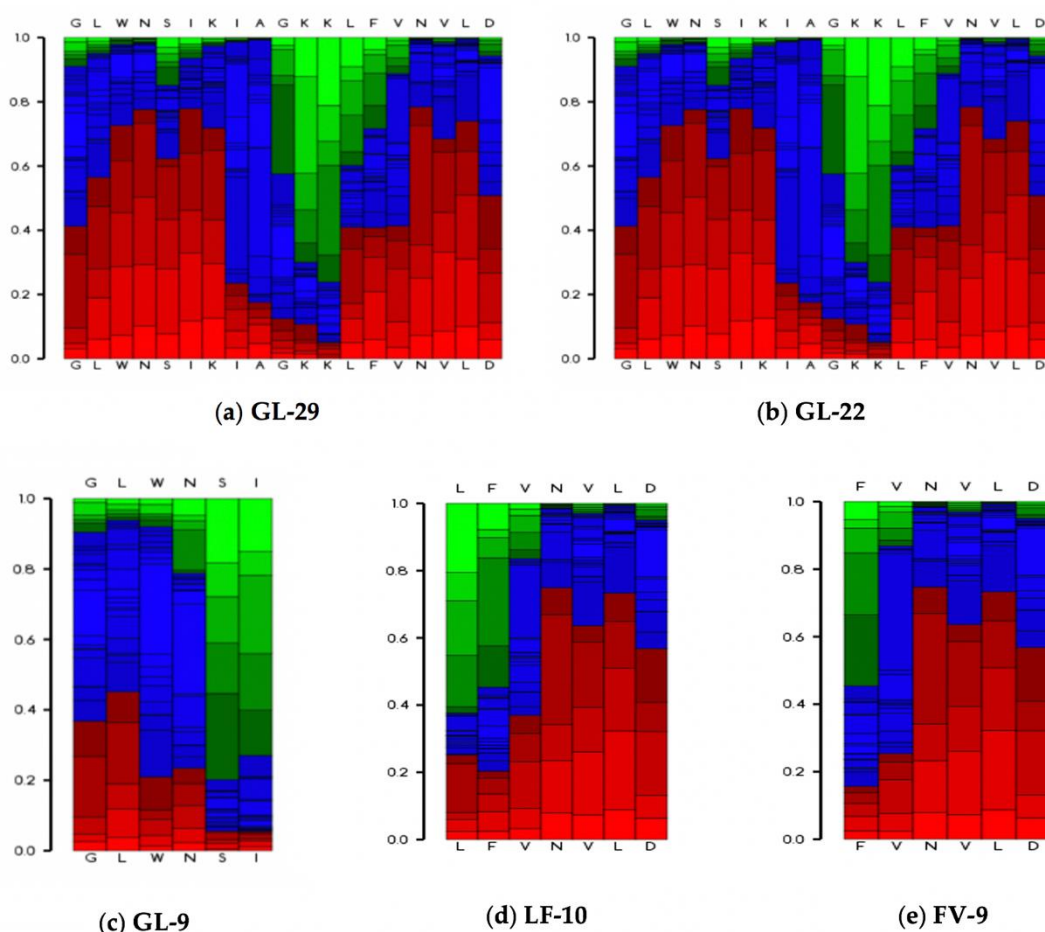

**Figure S1:** Secondary structure prediction of (a) GL-29, (b) GL-22, (c) GL-9, (d) LF-10 and (e) FV-9. The red, blue and green blocks in the figure represent the helical, coil and extended conformations. The secondary structure of VN-8 and FV-8 cannot be predicted due to the short length of the sequence.

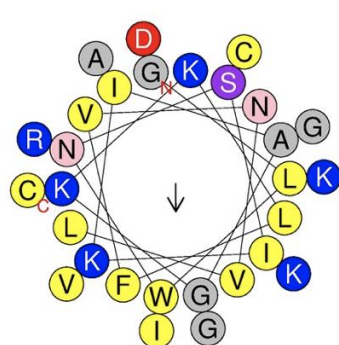

(a) GL-29

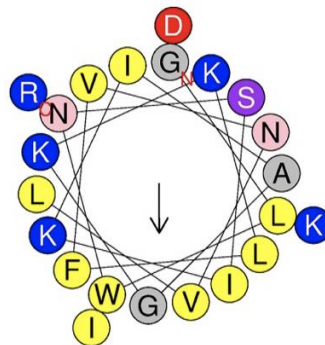

(b) GL-22

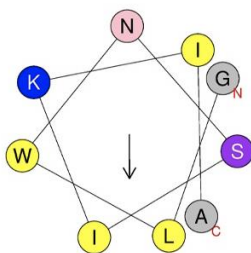

(c) GL-9

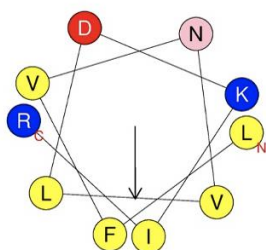

(d) LF-10

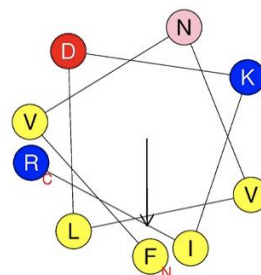

(e) FV-9

**Figure S2:** Helical wheel projections of (a) GL-29, (b) GL-22, (c) GL-9, (d) LF-10 and (e) FV-9 with the arrow indicating the direction of the hydrophobic moments. The physical parameter of VN-8 and FV-8 cannot be analysed by Heliquest due to the short length of the sequence.

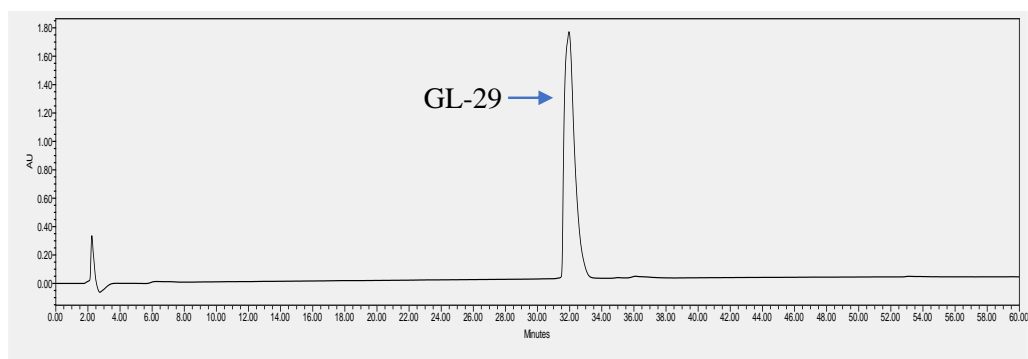

(a)

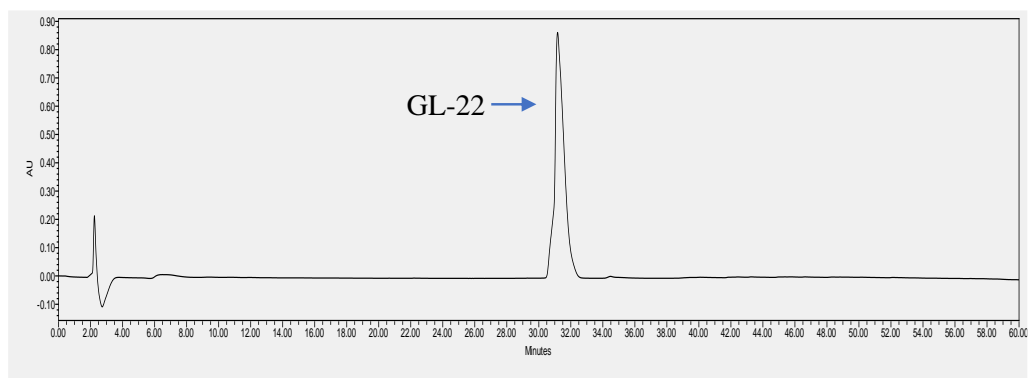

(b)

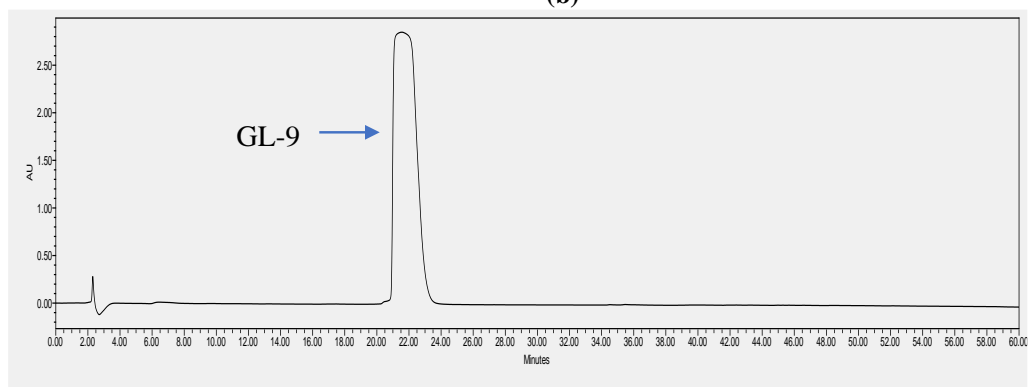

(c)

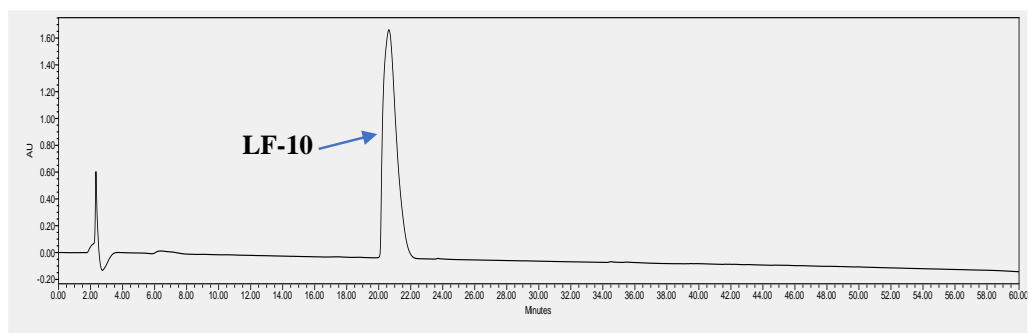

(d)

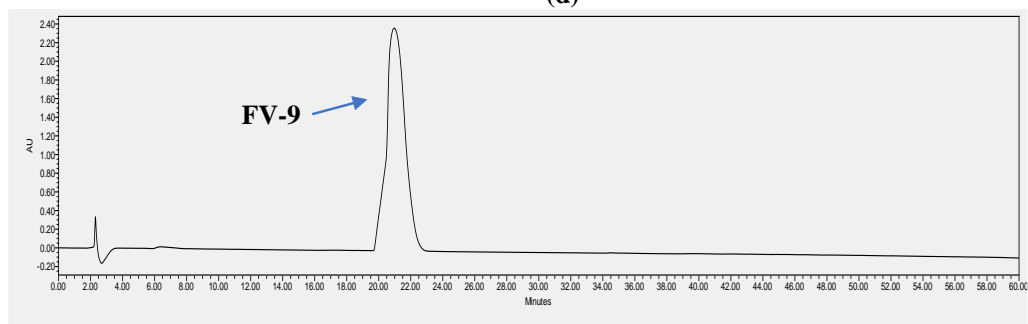

(e)

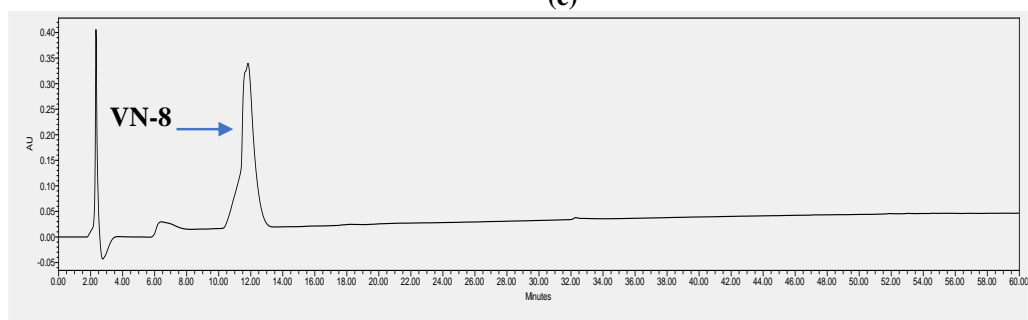

(f)

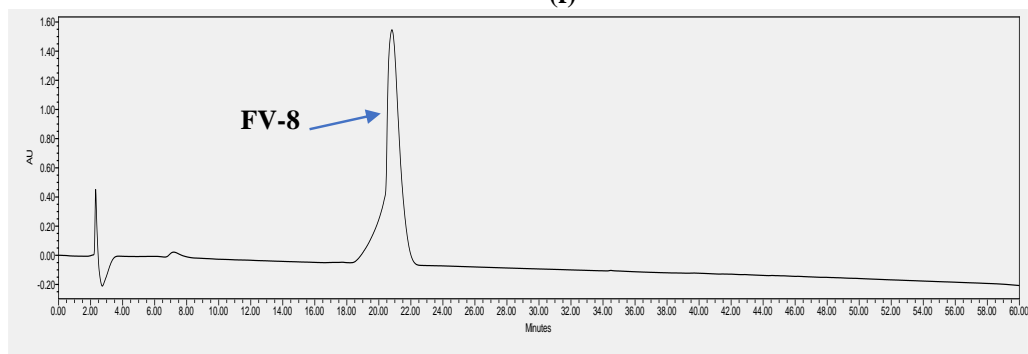

(g)

**Figure S3:** RP-HPLC chromatograph of GL-29 (a) and its analogues (b-g) at wavelength of 214nm and the arrow indicates the retention times/elution position of the peptide.

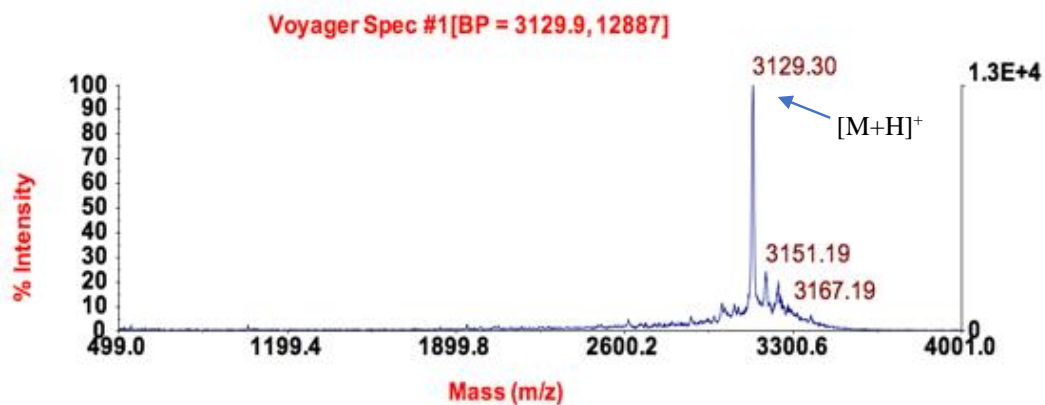

(a)

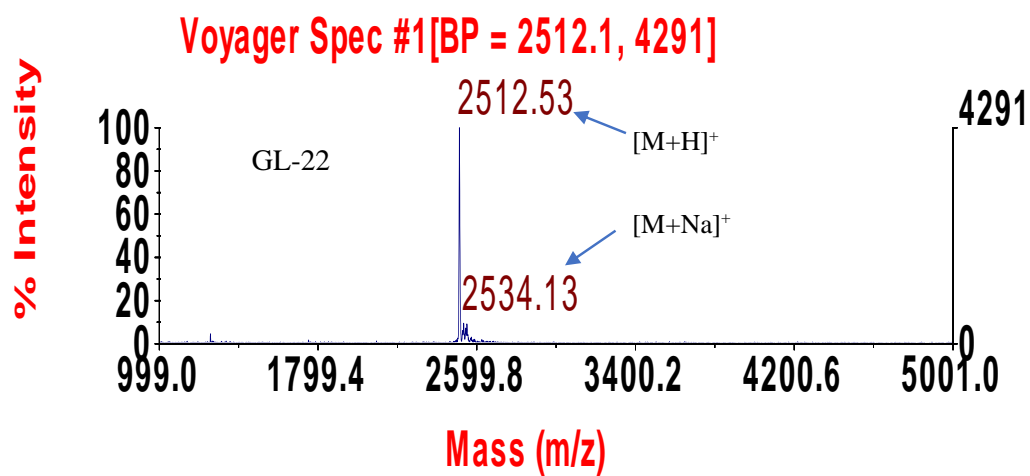

(b)

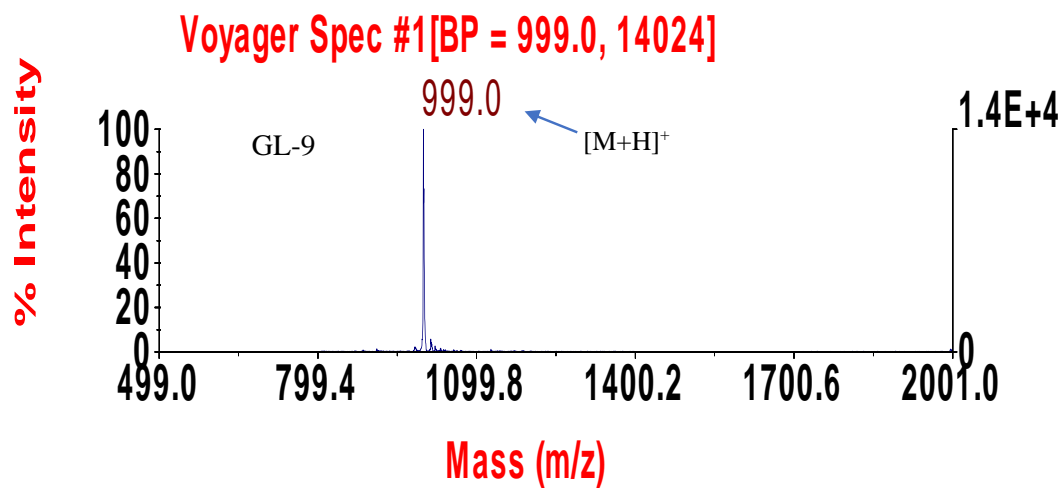

(c)

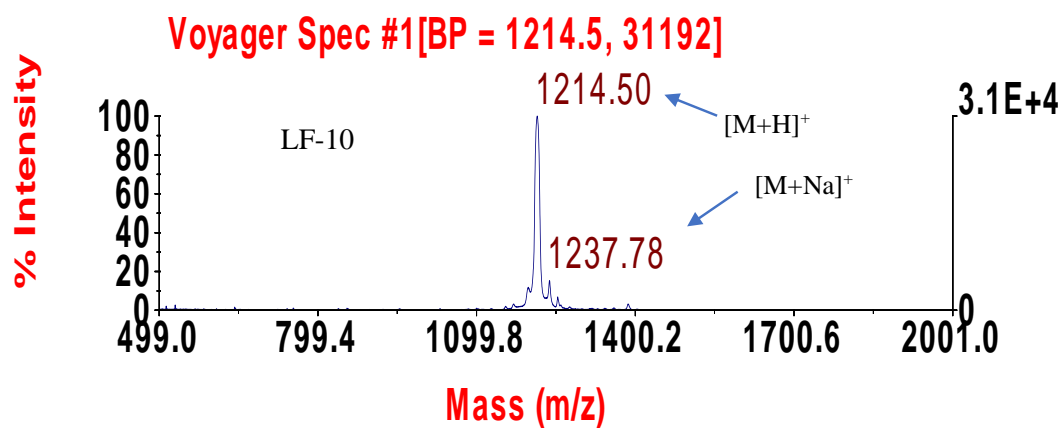

(d)

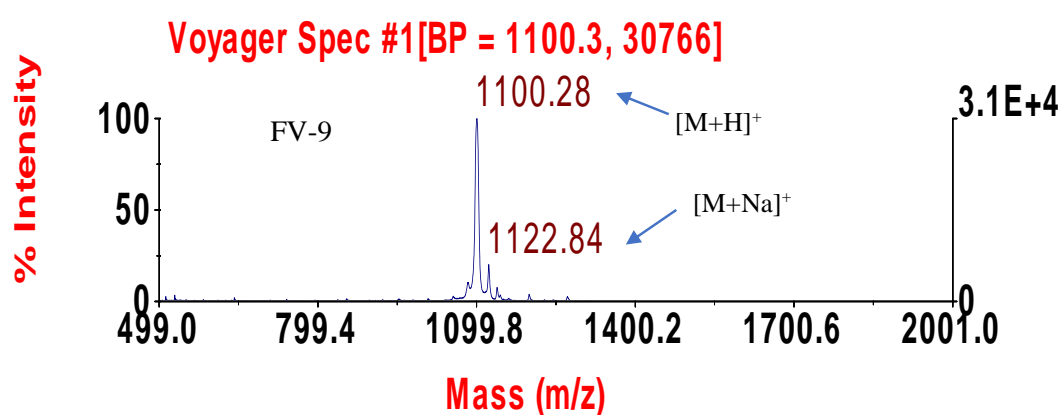

(e)

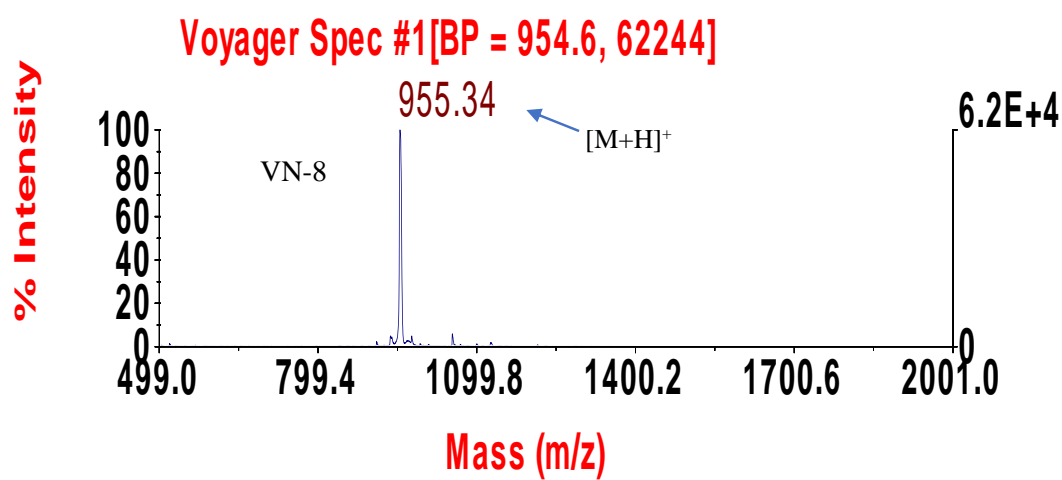

(f)

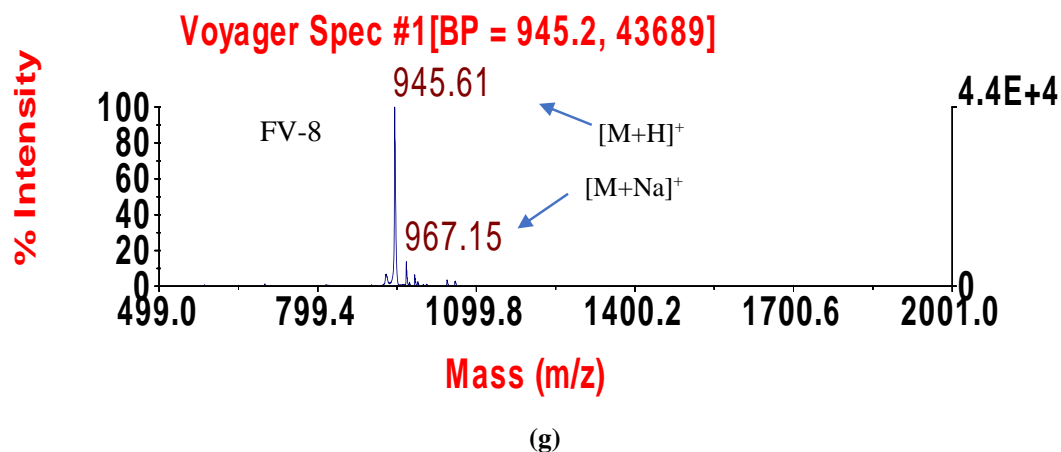

**Figure S4:** MALDI-TOF mass spectra of GL-29 and its analogues. MALDI-TOF mass spectrum of GL-29, the  $[M+H]^+$  ion was observed as 3129.30 Da and the peak with a mass of 3151.19 Da and 3167.19 Da represent the sodium adductive ion  $[M+Na]^+$  and the potassium adductive ion  $[M+K]^+$ , respectively (a). MALDI-TOF mass spectrum of GL-22, the  $[M+H]^+$  ion was observed as 2512.54 Da and the peak with a mass of 2534.56 Da represents the sodium adductive ion  $[M+Na]^+$  (b). MALDI-TOF mass spectrum of GL-9, the  $[M+H]^+$  ion was observed as 999.0 Da (c). MALDI-TOF mass spectrum of LF-10, the  $[M+H]^+$  ion was observed as 1214.50 Da and the peak with a mass of 1237.78 Da represents the sodium adductive ion  $[M+Na]^+$  (d). MALDI-TOF mass spectrum of FV-9, the  $[M+H]^+$  ion was observed as 1100.28 Da and the peak with a mass of 1122.84 Da represents the sodium adductive ion  $[M+Na]^+$  (e). MALDI-TOF mass spectrum of VN-8, the  $[M+H]^+$  ion was observed as 955.34 Da (f). MALDI-TOF mass spectrum of FV-8, the  $[M+H]^+$  ion was observed as 945.61 Da and the peak with a mass of 967.15 Da represents the sodium adductive ion  $[M+Na]^+$  (g).

**Table S1:** Secondary structure analysis of GL-22 truncated analogues in different solutions. These data represent the percentage (%) of helix, antiparallel and turn contents of different peptides. These were analysed by BeStSel (<http://bestsel.elte.hu/index.php>).

| Peptide | H <sub>2</sub> O |              |      | 50% TFE |              |      |
|---------|------------------|--------------|------|---------|--------------|------|
|         | Helix            | Antiparallel | Turn | Helix   | Antiparallel | Turn |
| GL-29   | 6.0              | 28.1         | 15.7 | 49.4    | 0.4          | 12.7 |
| GL-22   | 3.6              | 27.5         | 16.3 | 50      | 4.8          | 11.7 |
| GL-9    | 8.4              | 28.6         | 13.9 | 23.0    | 23.1         | 14.6 |
| LF-10   | 11.6             | 20.3         | 17.1 | 41.6    | 9.3          | 10.6 |
| FV-9    | 7.7              | 43.6         | 7.7  | 45.2    | 4.7          | 0.0  |
| FV-8    | 10.8             | 17           | 18.4 | 18.5    | 32.8         | 14.3 |
| VN-8    | 3.4              | 34.2         | 14.3 | 24.0    | 28.9         | 12.3 |
